# Supplementary material for: Transiently Reduced PI3K/Akt Activity Drives the Development of Regulatory Function in Antigen-Stimulated Naïve T-Cells
Source: PubMed Central journal article supplement (PMC3708928; doi:10.1371/journal.pone.0068378), 2013-07-11

# Figure S1

## Effect of inhibitor Titration on CD62-L levels

A

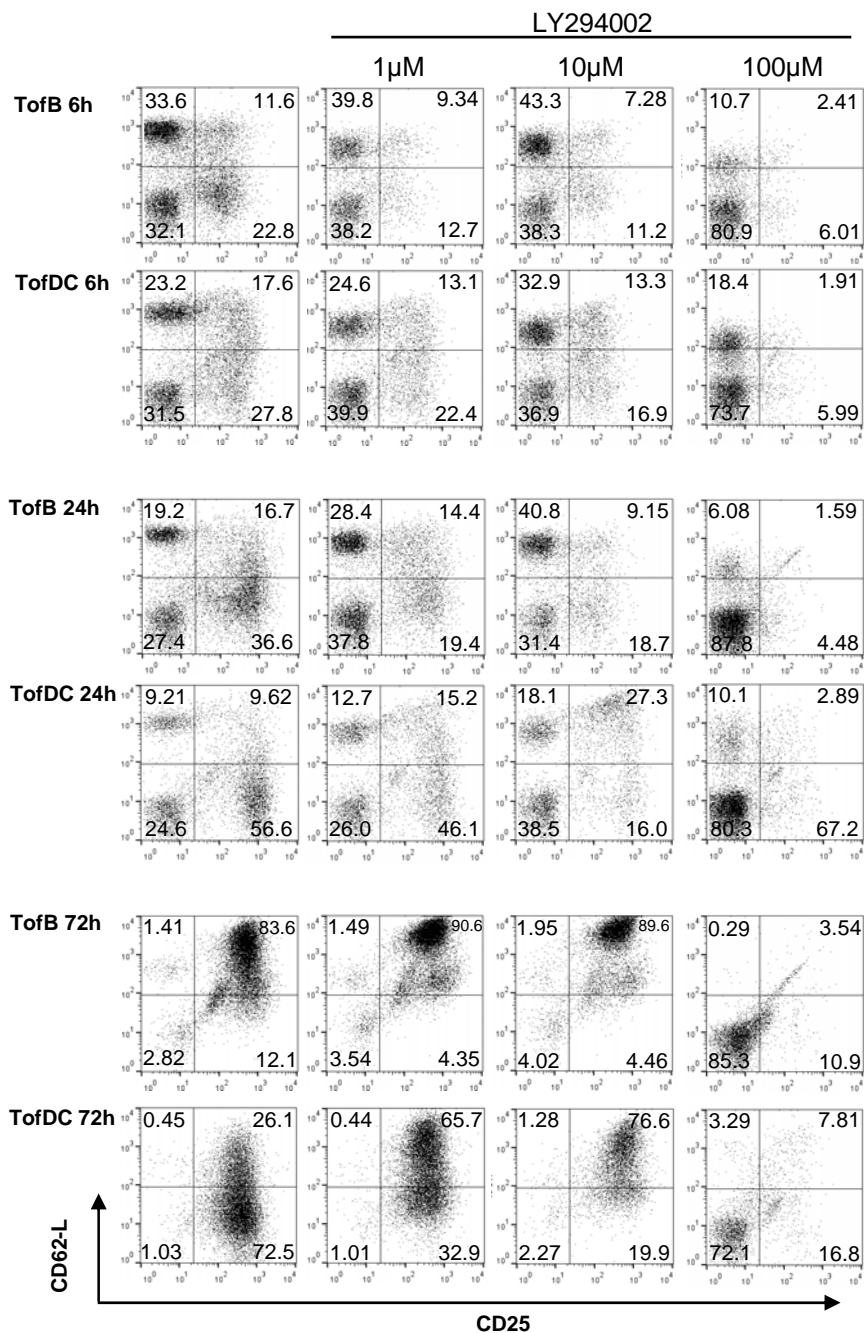

# Figure S1 continued

## Effect of inhibitor Titration on CD62-L levels

**B**

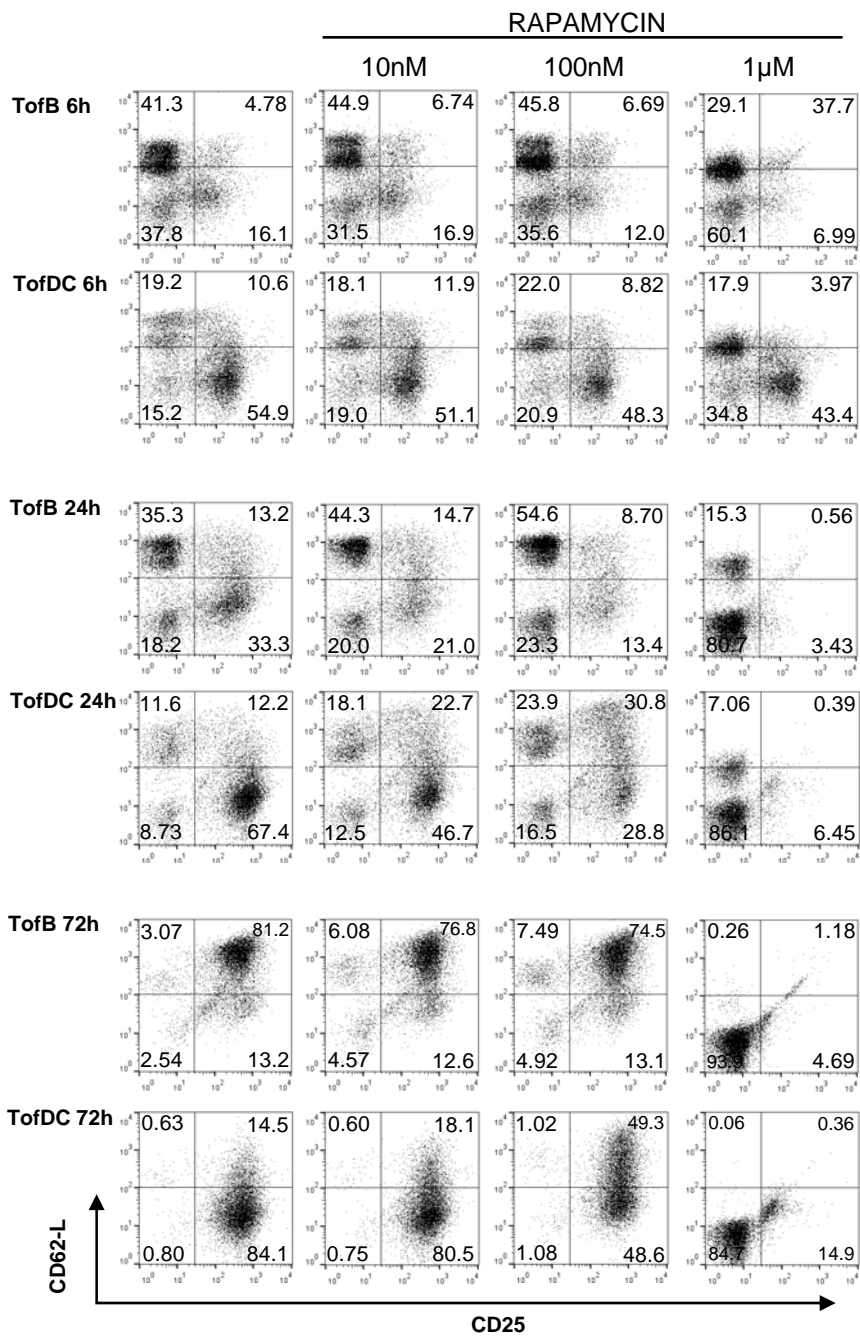

Supplement: pone.0068378.s001.pdf [file pone.0068378.s001.pdf]
